# Supplementary material for: Text-to-flowsheet: an LLM-assisted pipeline for expert-level digitization and automated simulation of chemical processes
Source: Royal Society of Chemistry journal article supplement (doi:10.1039/d6dd00060f), 2026-05-25
Supplement: d6dd00060f2.pdf [file d6dd00060f2.pdf]

# **Text-to-Flowsheet: An LLM-Assisted Pipeline for Expert-Level Digitization and Automated Simulation of Chemical Processes**

## **- Supplementary Information -**

Jan-Frederic Laub,<sup>†,‡</sup> Luca Bosetti,<sup>†</sup> and André Bardow<sup>\*,†,‡</sup>

<sup>†</sup>*Energy and Process Systems Engineering, ETH Zurich, Switzerland*

<sup>‡</sup>*NCCR Catalysis, Switzerland*

E-mail: [abardow@ethz.ch](mailto:abardow@ethz.ch)

This supplementary information contains

- the table of considered unit operations,
- a complete description of the topology generation pipeline,
- a complete description of the chemical augmentation pipeline,
- a complete discussion of the flowsheet similarity metrics,
- a comparison to a “single-prompt” inference mode,
- a comparison between different LLMs, including a much smaller LLM,
- details on the permutation test between expert- and LLM-generated flowsheets,
- the complete distribution of expert similarities,
- examples of expert flowsheet drawings,
- details on the test set processes,
- the objective functions for black-box unit optimization,
- an example of the multi-objective black-box unit optimization,
- the full process descriptions for example 1, 2, and 4, and
- all LLM prompts for “text2flowsheet”.

## SI 1 Table of Unit Operations and Aspen Models

Table SI 1: List of considered unit operations, their abbreviations, number of incoming and outgoing streams, and preferred model in Aspen Plus (see also Figure 4 of the manuscript). Adapted from Vogel *et al.* (2023).<sup>1</sup>

| Unit                                        | Abbreviation | In /<br>Out Degree | Preferred Aspen<br>Plus Model |
|---------------------------------------------|--------------|--------------------|-------------------------------|
| Absorption                                  | Abs          | 2/2                | Radfrac                       |
| Centrifuge                                  | Centr        | 1/2                | Sep                           |
| Compressor                                  | Comp         | 1/1                | Compr                         |
| Condenser                                   | Cond         | 1/1                | Heater                        |
| Cooler                                      | Cool         | 1/1                | Heater                        |
| Cyclone                                     | Cycl         | 1/2                | Sep                           |
| Distillation (incl. reboiler and condenser) | Dist         | 1/2                | Radfrac                       |
| Drying                                      | Dry          | 1/2                | Sep                           |
| Evaporator                                  | Evap         | 1/1                | Heat                          |
| Expander                                    | Expand       | 1/1                | Valve                         |
| Extraction                                  | Extr         | 2/2                | Extract                       |
| Extractive Distillation                     | exDist       | 1/2                | Radfrac                       |
| Flash                                       | flash        | 1/2                | Flash2                        |
| Gas filtration                              | Gfil         | 1/2                | Sep                           |
| Heater                                      | Heat         | 1/1                | Heater                        |
| Heat exchanger                              | Hex          | 1/1                | HeatX                         |
| Hydrocyclone                                | Hcycl        | 1/2                | Sep                           |
| Liquid filtration                           | Lfil         | 1/2                | Sep                           |
| Mixing                                      | Mix          | $\geq 2/1$         | Mixer                         |
| Product (Outlet)                            | Prod         | 1/0                | MATERIAL                      |
| Pump                                        | pp           | 1/1                | Pump                          |
| Raw Material (Inlet)                        | Raw          | 0/1                | MATERIAL                      |
| Reactor                                     | r            | 1/1                | RGibbs                        |
| Scrubbing                                   | Scrub        | 2/2                | Extract                       |
| Separation (no further sub-specification)   | Sep          | 1/2                | Sep                           |
| Settling                                    | Set          | 1/2                | Decanter                      |
| Splitting                                   | Splt         | 1/2                | FSplit                        |
| Stripping                                   | Strip        | $\geq 1/2$         | Radfrac                       |
| Storage                                     | Tank         | 1/0                | MATERIAL                      |
| Unknown unit                                | X            | 1/1                | MULT (dummy)                  |

## SI 2 Complete description of the topology generation pipeline

Accompanying Figure 2 of the main manuscript:

First, the LLM is tasked with extracting all unit operations explicitly mentioned, or sufficiently implied, in the process description (Figure 2, a1). Additionally, the LLM extracts all raw-material streams crossing the system boundary and all product, co-product, and waste streams leaving the system. The resulting pool of constitutive unit operations and boundary streams serves as the basis for the units' topological arrangement, i.e., the material flow through the production steps. For each extracted unit, the LLM determines its unit operation type, thereby configuring the desired number and types of the unit's outlet streams (e.g., top/bottom or vapor/liquid). The set of unit types is harmonized with the OntoCAPE process engineering ontology<sup>2</sup> through the SFILES2 framework,<sup>1</sup> as shown in Table SI 1.

Figure 2 shows the overall processing step sequence. The core step in composing a process's topology is a depth-first, iterative graph construction in which the LLM determines the placement of a subsequent node at each open stream (Figure 2, a2). The flowsheet graph is initialized with all raw material streams (defined as nodes) extracted in the previous step (Figure 2, a2a). Then, the LLM is queried to determine the next unit in the process sequence from the candidate pool of unit operations and product streams (Figure 2, a2b). The preliminary topology is complete once depth-first graph construction is exhausted, i.e., every node has a successor or is itself a product stream.

In the next step, the LLM re-examines any leftover unit operations and product streams from the initial candidate pool (Figure 2, a3). The LLM checks whether any leftover unit can be reasonably integrated at any point in the preliminary topology, drawing again on the process description, and discards it if not.

The preliminary topology undergoes checks for logical consistency with process design conventions. For example, any unit operation that should have an outgoing stream but has no following unit or product stream associated with that outlet is assigned a stream leaving the system boundary (Figure 2, a4). For each newly added outlet, the LLM is tasked with determining a possible role of that stream within the process description. Similarly, any unit operation that should but does not yet receive a solvent, entrainer, or similar is equipped with a corresponding inlet, and the LLM again characterizes this stream.

After undergoing further checks for logical consistency with the text and process design conventions, the topology graph closely reflects the structural information in the process description while meeting the basic topological requirements of a process flowsheet. From this point on, the topology is not further manipulated by the LLM and serves as the basis for subsequent information extraction steps that augment it with chemical and operational data.

### **SI 3 Complete description of the chemical augmentation pipeline**

After completing the topology pipeline described in the previous section, the process graph describes the material flow through the process and contains the type of each unit operation. Usually, process descriptions include additional information, such as the names of produced and consumed chemicals, stream compositions, temperatures, and pressures. This data is now extracted from the text by the LLM and assigned to the relevant unit nodes in the graph representation.

First, the chemicals contained in each raw material, product, co-product, and waste stream are extracted from the text. The extracted chemical designations are automatically canonicalized to their IUPAC names using PubChem<sup>3</sup> and to canonical SMILES using RDKit.<sup>4</sup>

Next, the chemicals involved in each reactor unit are extracted and classified. Starting from a reactor unit, all upstream raw materials and all downstream products are gathered. To ensure that no trace compounds or catalysts are overlooked, the LLM is also tasked with extracting all relevant chemical compounds from the reactor description itself. Then, the LLM classifies each chemical associated with the reaction as a reactant, product, byproduct, catalyst, or solvent. Additionally, the main product of the reaction is flagged, which can be the overall product of the process or an intermediate. If available in the text, the LLM also adds the reactor temperature and pressure as attributes of the reactor node. Similarly, relevant operational conditions are recorded for all other units.

If stoichiometries for the process’s reactions are available in the process description or associated information, these attributes are added to the reactor nodes. If not, a possible stoichiometry is computed for the extracted chemicals by minimizing the Gibbs free energy of the reaction under the constraint of fulfilled elemental balances. Common reaction side products, such as water and carbon dioxide, are also included in the pool of possible chemicals when computing a mechanistically reasonable stoichiometry. The stoichiometric compositions of the reactant streams are calculated and added as attributes to the raw material streams, serving as potential initialization points for subsequent simulation.

The core element of process data augmentation is the analysis of the process’s separation steps. For the eventual simulation, it is critical to determine which component-wise splits are targeted by each separation unit, as specified in the process description. As this information is often absent or only implied in natural language sources, we trace the component splits from products to reactants in the opposite direction to the process’s material flow: First, all recycle streams are temporarily torn to convert the flowsheet graph into a tree. Then, a hierarchy of separation nodes is determined based on each separator unit’s distance to the

last reactor node. The components of each stream are traced back through the flowsheet level by level, starting from the outlet streams. At each separation node, the outgoing components are aggregated into a list, and the component-wise split at that node is recorded and categorized by outlet stream type (e.g., top/bottom or vapor/liquid). When one of the separator’s outlets is not connected to a product node because it is part of the recycle in the original cyclic graph, the LLM is queried to determine the recycled compounds using the process description as context.

Identifying the key components in each stream characterizes the separation tasks. In the case of distillation-like units, the boiling temperature of each compound is computed with FeOs<sup>5</sup> using the experimentally fitted PC-SAFT parameters from Esper *et al.* (2023)<sup>6</sup> if available, or, if not, the predicted PC-SAFT parameters from Winter *et al.* (2025).<sup>7</sup> If the separation pressure or temperature is given, the boiling points are calculated at that condition; otherwise, they are computed at atmospheric conditions. The compounds in the distillate and bottom streams are sorted by relative volatility, and the heavy and light key components are identified. If the determined heavy key has higher volatility than the light key, this check indicates that the LLM incorrectly interpreted the topology of the unit’s outgoing streams. Consequently, the positions of the outlet streams are corrected in the graph.

The determined process topology, together with the augmented chemical and operational data, is further processed to enable its automatic translation into Aspen Plus: First, any graph structure is deleted that is not connected to the main process topology, i.e., the largest subgraph that involves a product stream of the processes’ main product. Then, a mixing node is inserted before any unit with more than one incoming stream. Finally, paths that start from a raw material node and involve ill-defined chemical species, e.g., due to failed name lookup and standardization, are excluded.

## SI 4 Discussion of the flowsheet comparison metrics

In this section, we discuss and select appropriate metrics for flowsheet similarity and a strategy to place them in a domain-specific context through empirically assessed expert flowsheet drawings.

### SI 4.1 Topology-invariant similarity

Commence and Piña-Martinez (2026)<sup>8</sup> define a metric of dissimilarity between two flowsheets based on evolutionary graph manipulations. The metric considers the manipulations of adding nodes (unit operations), deleting nodes, and merging input and output streams at the flowsheet boundary. Given two flowsheet graphs  $G_1$  and  $G_2$ , this metric computes the number of manipulation steps required to convert the first graph into a second graph with the same number of units (per type and degree), the same number of streams, and the same number of external inputs and outputs as the second graph. However, this metric does not account for the graphs' inner connectivities. As a result, the metric cannot distinguish between two flowsheets that have the same number of units (per type and degree) and streams, but differ in arrangement.

Nevertheless, the metric could be helpful, as it is rooted in domain knowledge by drawing on common graph manipulations in evolutionary process design (see, for example, Neveux (2018)).<sup>9</sup> Here, we calculate the average dissimilarity  $d_{\text{av}}(G_1, G_2) = \frac{d(G_1, G_2) + d(G_2, G_1)}{2}$  based on the instructions in Commence and Piña-Martinez (2026),<sup>8</sup> normalize it with respect to the total number of nodes ( $V_1$  and  $V_2$ ) of both graphs, and subtract it from one to arrive at a similarity score bounded between zero and one:

$$S_{\text{evol}}(G_1, G_2) = 1 - \frac{d_{\text{av}}(G_1, G_2)}{|V_1| + |V_2|}. \quad (1)$$

## SI 4.2 Topology-aware similarity

To obtain a topology-sensitive yet computationally tractable similarity score, we employ a graph kernel based on the Weisfeiler–Lehman (WL) subtree framework.<sup>10</sup> WL-type graph kernels are typically recommended for sparse graphs,<sup>11</sup> like our flowsheets. The WL kernel measures structural similarity by iteratively refining node labels based on their local neighborhoods. In each WL iteration, every node aggregates the hashed multiset of labels of its adjacent nodes, thereby encoding increasingly larger local substructures. After three refinement steps, the resulting multilevel label histograms serve as feature maps of the two graphs  $G_1$  and  $G_2$ . The inner product of the histograms yields the WL kernel value  $k_{\text{WL}}(G_1, G_2)$ , which grows with the number of identical neighborhood patterns between the graphs.

In our context, the WL kernel seems to be well-suited because it naturally incorporates the unit operation types already encoded as node labels. Thus, two flowsheets that employ similar units but arrange them differently produce distinct WL fingerprints, whereas flowsheets that share both unit types and their connectivity patterns yield more similar feature maps. However, raw kernel scores  $k_{\text{WL}}(G_1, G_2)$  are not yet interpretable as similarity values, because they depend on the absolute magnitude of the feature vectors. We therefore normalize the WL kernel to obtain a bounded similarity metric:

$$S_{\text{WL}}(G_1, G_2) = \frac{k_{\text{WL}}(G_1, G_2)}{\sqrt{k_{\text{WL}}(G_1, G_1) k_{\text{WL}}(G_2, G_2)}}, \quad (2)$$

which is equivalent to the cosine similarity of the WL-derived feature embeddings. This normalization yields values in  $[0, 1]$ , with 1 indicating identical WL representations (i.e., matching unit types and topologies under WL refinement) and 0 indicating no shared substructure.

### SI 4.3 Flowsheet similarity among expert-level text interpretations

To validate the digitization methodology, we want to compute the similarity metrics between flowsheets automatically generated by the LLM and those generated by experts. While the similarity metrics alone provide a reasonable indication of digitization success, we do not necessarily expect a satisfactory value to be close to 100%, as the process texts usually contain ambiguous information that can be interpreted in different yet equally valid ways. We therefore seek to calculate upper and lower reference points that help to place similarity scores into our domain-specific context.

To account for ambiguities in the text descriptions, a meaningful upper target range of digitization success can be determined by assessing the average similarity between flowsheets drawn by experts for the same process description. For this purpose, we have gathered a total of 101 expert-drawn flowsheets for 30 processes and computed pairwise similarity scores. As expected, the similarity scores rarely exceed 80% (see Figure 4), indicating that experts regularly disagree to some extent on how to represent the given textual information in a flowsheet drawing. The distribution of pairwise expert similarities provides a measure of uncertainty that helps contextualize eventual validations of the LLM-generated flowsheets.

The medians of the two metrics are to some extent correlated, with a Pearson correlation of 0.78, because the WL metric also implicitly accounts for unit-type distributions. However, in many cases, the evolutionary metric yields greater similarity scores by disregarding topological differences among similar units.

Nevertheless, the two metrics provide distinct information for analysis: Figure 3 (manuscript) shows the distributions of pairwise similarities between expert-drawn flowsheets for two exemplary processes from the test set, using both similarity metrics. Process text #5 describes one reactor and four subsequent distillation steps. All experts correctly place one reactor

and four distillation columns in their flowsheets, but interpret the number and destination of the described recycles differently (see supplementary information<sup>†</sup>). The differing topologies have only a weak, indirect impact on the evolutionary score, through some missing outlet streams, but are clearly reflected in the comparatively lower WL scores and their wider spread. Compare this topological effect on the scores with the flowsheet similarities for process #18: Here, many experts largely agree on the unit types and overall topological structure of the process, as reflected in the evolutionary and WL scores. Expert 2’s interpretation of process #18 (see supplementary information<sup>†</sup>) is the least similar to all other expert drawings, particularly due to the handling of a heat-integrated stream, which affects the WL score’s distribution as seen in Figure 3 (manuscript). For these reasons, we employ both metrics for expert correspondence as the upper target ranges for the accuracy of the LLM-assisted digitization pipeline.

The random graphs are generated uniformly from a range of  $[N_{\min}^{\text{exp}}, N_{\max}^{\text{exp}}]$  nodes and edge densities within  $[\rho_{\min}^{\text{exp}}, \rho_{\max}^{\text{exp}}]$ , where  $N^{\text{exp}}$  represents the number of nodes and  $\rho^{\text{exp}}$  the edge densities of the process’s expert flowsheets. To generate the random, flowsheet-like graphs, first, a random tree is generated, and then edges are appended until the desired edge density is reached, yielding flowsheet-like (weakly connected, directed, sparse) yet random graph structures. The random similarities are considerably lower for the WL score than for the evolutionary metric because random graphs can differ in many more ways when considering graph connectivity in addition to the distribution of unit types.

## SI 5 Comparison to “single-prompt” inference mode

We posed the topology generation and chemical augmentation task to the LLM GPT-OSS as a single prompt, rather than the multi-step pipeline presented in the manuscript, under otherwise identical conditions. The used DSPy signature was:

```

1 class OnePromptFlowsheetGeneration(dspy.Signature):
2     """
3     You are an expert chemical process engineer. Given a process
4     description and its main product, generate a complete, fully annotated
5     process flowsheet in a single structured response.
6
7     UNIT IDs: Assign sequential IDs U_1, U_2, U_3, ... to all units.
8
9     UNIT TYPES and their required stream labels (keys of following_units):
10    Raw:          {"raw": <next_unit_id>}
11    Prod:         {}
12    Mix:          {"main": <next>}
13    r (Reactor): {"main": <next>}
14    Dist:         {"top": <next>, "bottom": <next>}
15    Rect:         {"top": <next>, "bottom": <next>}
16    azDist:       {"top": <next>, "bottom": <next>}
17    exDist:       {"top": <next>, "bottom": <next>}
18    reDist:       {"top": <next>, "bottom": <next>}
19    Strip:        {"top (vapor)": <next>, "bottom (liquid)": <next>}
20    Abs:          {"vapor": <next>, "liquid": <next>}
21    Scrub:        {"vapor": <next>, "liquid": <next>}
22    flash:        {"vapor": <next>, "liquid": <next>}
23    Extr:         {"raffinate": <next>, "extract": <next>}
24    Sep:          {"light": <next>, "heavy": <next>}
25    Set:          {"light": <next>, "heavy": <next>}
26    Splt:         {"split_1": <next>, "split_2": <next>}
27    Cryst:        {"liquid": <next>, "solid": <next>}
28    Centr:        {"centrate": <next>, "discharge": <next>}
29    Cycl:         {"centrate": <next>, "discharge": <next>}
30    Hcycl:        {"centrate": <next>, "discharge": <next>}
31    Dry:          {"water": <next>, "dry": <next>}
32    Gfil:         {"permeate": <next>, "retentate": <next>}
33    Lfil:         {"permeate": <next>, "retentate": <next>}

```

```

32     Heat/Cool/Hex/Evap/Comp/Cond/pp/Expand/Reb/X: {"main": <next>}
33
34     FIELD RULES per unit type:
35     - Raw / Prod:
36         chemical_compounds: list the exact chemical name(s) in that feed/
product stream.
37     - r (Reactor):
38         reaction_compounds: classify every chemical involved (reactant,
product, byproduct, catalyst, solvent).
39         reaction_temperature_K
40         reaction_pressure_bar
41     - Dist / azDist / exDist / reDist / Rect / Strip:
42         distillation_top_pressure_bar, distillation_bottom_pressure_bar
43         separation_streams: one entry per output label (e.g., label="top",
chemicals=[...])
44         light_key
45         heavy_key
46         azeotrope_exists
47         azeotrope_components
48     - Abs / Scrub / Extr / Sep / Set / Crys / flash / Centr / Cycl / Lfil
/ Gfil / Hcycl / Dry:
49         separation_streams, light_key, heavy_key
50
51     all_components: the deduplicated list of ALL chemical species
appearing anywhere in the flowsheet. Use IUPAC names or standard
accepted names.
52
53     Return your answer as a single JSON object:
54     {
55         "units": [
56             {
57                 "unit_id": "U_n",
58                 "name": "<descriptive name>",

```

```

59     "type": "<one of the types listed above>",
60     "description": "<description>",
61     "function": "<production|maintenance|unclear>",
62     "following_units": {"<stream label>": "<unit_id or null>"},
63     "chemical_compounds": ["<chemical>"],
64     "reaction_compounds": [
65         {
66             "name": "<chemical>",
67             "role": "<reactant|product|byproduct|catalyst|solvent|
maintenance|N/A>",
68             "is_main_product": "<True|False>",
69             "is_base_reactant": "<True|False>"
70         }
71     ],
72     "reaction_temperature_K": null,
73     "reaction_pressure_bar": null,
74     "distillation_top_pressure_bar": null,
75     "distillation_bottom_pressure_bar": null,
76     "separation_streams": [{"label": "<stream label>", "chemicals":
["<chemical>"]}],
77     "light_key": ["<chemical>"],
78     "heavy_key": ["<chemical>"],
79     "azeotrope_exists": false,
80     "azeotrope_components": []
81     }
82     ],
83     "all_components": ["<chemical>"]
84     }
85     ""
86     process_description: str = dspy.InputField()
87     main_product: str = dspy.InputField()
88     flowsheet: str = dspy.OutputField()

```

Figure 1 summarizes the performance of the “single-prompt” setup compared to the multi-step pipeline on the test set of expert drawings. The “single-prompt” setup failed to produce a flowsheet in 22 out of 30 cases. As a consequence, the single-prompt outputs cannot be reliably processed for comparison to expert flowsheets or Aspen Plus simulations. In the eight cases where the LLM does produce a graph topology with a single prompt, is it on average less similar to the expert interpretations than the flowsheets produced by the full pipeline.

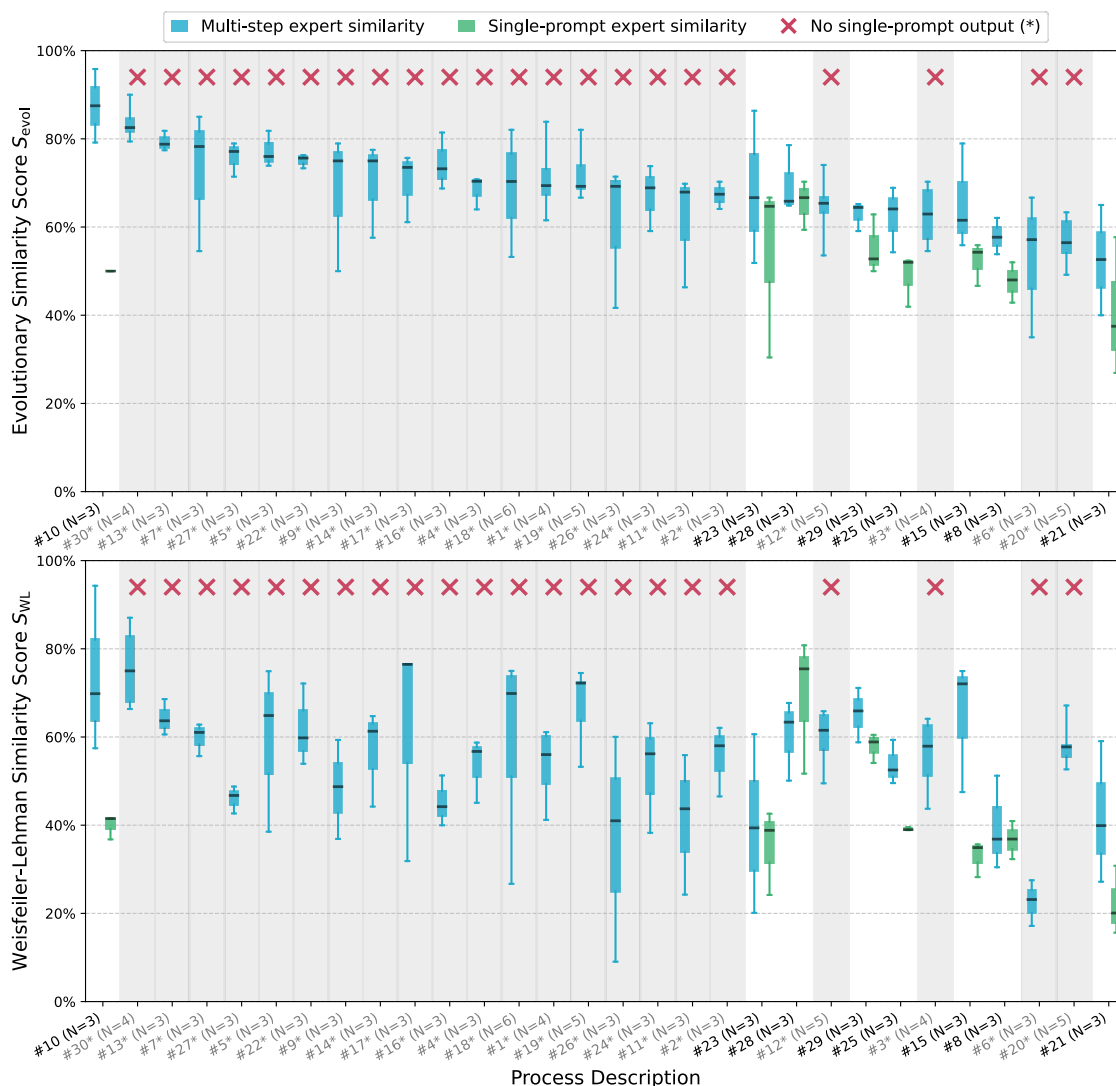

Figure 1: Similarity of LLM-generated flowsheets to the expert flowsheets using the text2flowsheet pipeline (blue) and using the single-prompt mode (green). If no green boxplot is shown, the single-prompt mode did not produce an adequate output for processing to a valid graph structure.

The shortcomings of the “single-prompt” setup motivate a central design decision of our multi-step pipeline: robust adherence to structured output by using smaller prompts with a limited scope each but high accuracy overall through their sequential execution. Furthermore, the multi-step pipeline can include steps outside the LLM prompt, such as rigorous thermodynamic computations, that aid the mechanistic grounding and interpretability of the flowsheet digitization. For these reasons, we would still recommend robust, structured, and grounded inference modes, even though LLMs advance rapidly and can perform increasingly complex tasks in a single prompt. Furthermore, from a user-experience perspective, the single- and multi-step modes appear very similar, as the “text2flowsheet” and “graph2simulation” tools can hide most of the multi-step complexity through their high degree of automation.

## **SI 6 Comparison between different LLMs**

In the main manuscript, we used the cloud model GPT-5-mini whenever possible, so that users of the tool can easily obtain comparable results by plugging in their API key rather than setting up the local GPT-OSS model that requires substantial GPU resources. Figure 2 shows that the cloud and local models yield comparable results with a high degree of reliability. On average, the local model performs slightly better with 7.6 percentage points higher in the evolutionary metric, and 5.2 percentage points higher in the WL metric. The comparatively better performance should be seen in relation to ease of use, which for the default user is higher with cloud models. The examples detailed in the main manuscript, therefore, represent results in a quality that an average user can expect from deploying the data pipelines.

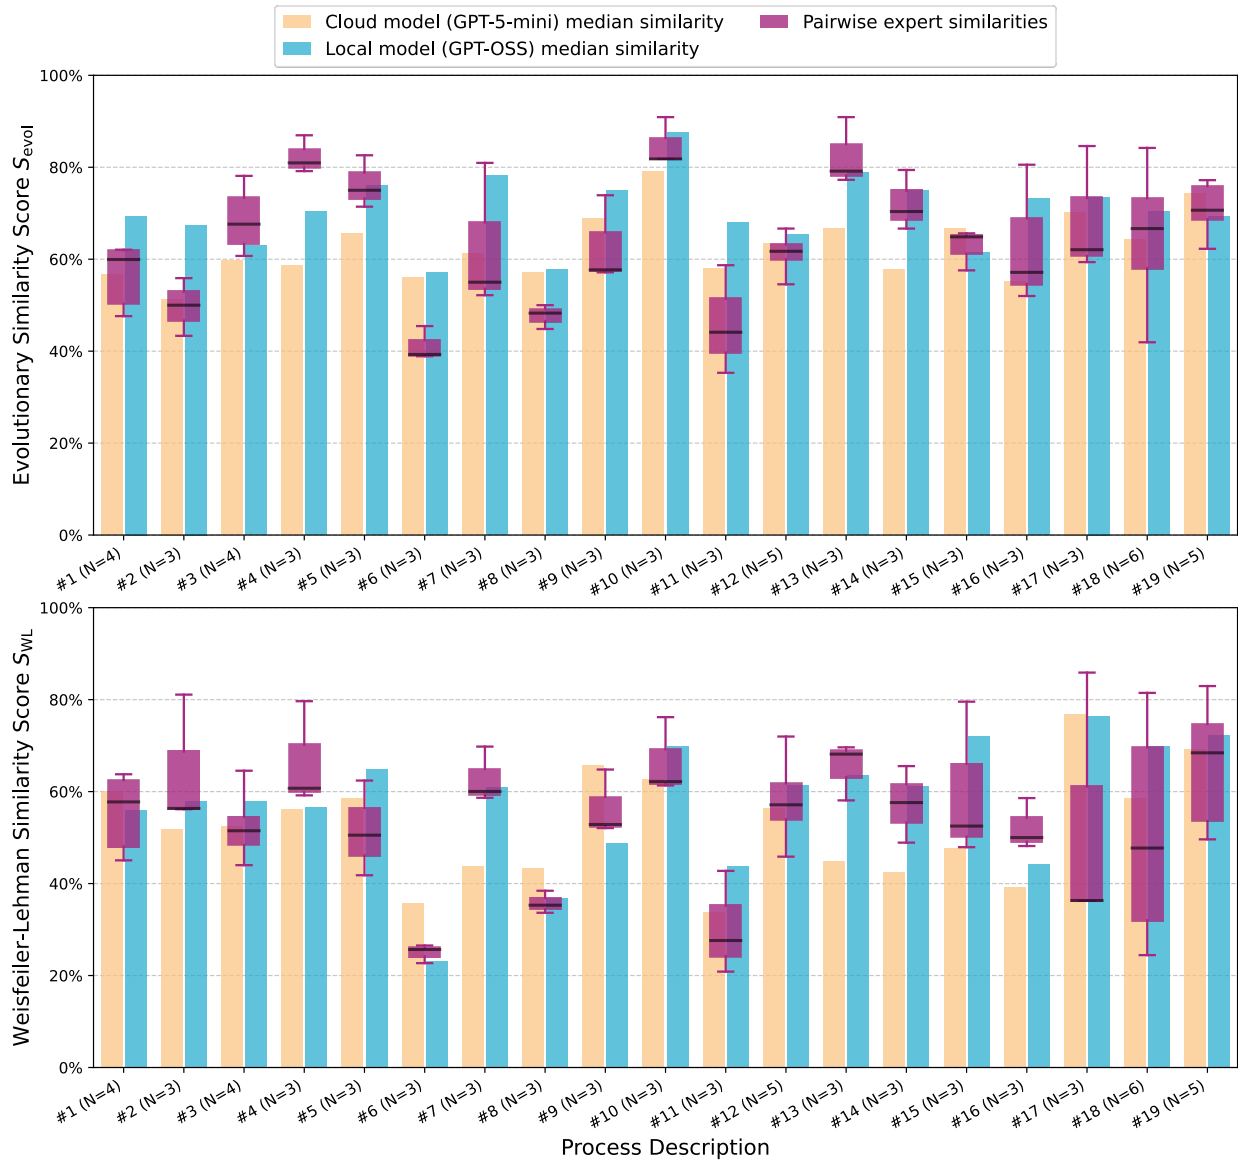

Figure 2: Comparison of LLM to expert similarities between the cloud model GPT-5-mini and the local model GPT-OSS.

We have further compared the performance of the much smaller, more consumer-grade local LLM Llama3.1 with 8 billion parameters to GPT-OSS. Figure 3 shows that the main failure mode is the lack of adherence to structured output (19 out of 30 cases), preventing further automated processing. However, when output is generated adequately, the digitized flowsheets are similar to the experts' interpretations, albeit less so than the flowsheets generated by the larger model.

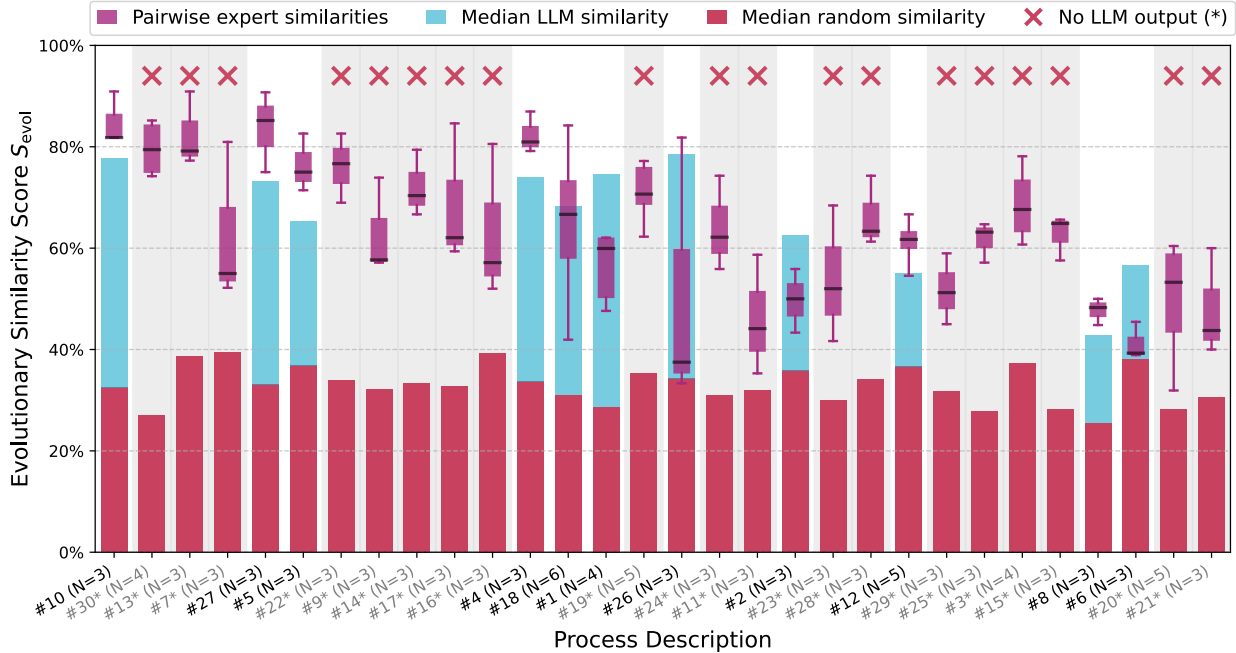

Figure 3: Performance of the text2flowsheet pipeline with respect to expert drawings using Llama3.1 8B. If no blue bar is shown, the pipeline did not produce an adequate output for processing to a valid graph structure.

## SI 7 Permutation test on distinction between LLM and expert flowsheets

To test if the LLM-generated flowsheets are statistically indistinguishable from the expert-drawn flowsheets, we perform a permutation test for each process of the test set. Null hypothesis is  $H_0 : T_{\text{LLM}} \sim T_{\text{reference}}$  where  $T_{\text{LLM}}$  is the mean similarity of the LLM graph to all expert graphs, and  $T_{\text{reference}}$  is the same statistic computed for each expert graph to all other graphs. The alternative hypothesis is that the LLM graph is less similar compared to all expert graphs than when any expert graph is singled out and compared to all other graphs. Table SI 2 shows the p-values for each test set process under both similarity metrics discussed in manuscript Section 2.2.

Due to the low per-process sample size, we perform an aggregated meta-analysis over all 30 test processes using the Fisher combined p-value. For the evolutionary metric  $S_{\text{evol}}$ , the

combined p-value is 0.999718. For the kernel-based metric  $S_{\text{WL}}$ , the combined p-value is 0.999854. Overall, the null hypothesis cannot be rejected at any level, and there is no consistent trend of the LLM-generated graph being less similar than the expert graphs. Practically, the LLM-generated flowsheets are indistinguishable from the expert interpretations.

Table SI 2: p-values for the permutation test outlined above using both similarity metrics discussed in the main manuscript.

| Process ID | $p(S_{\text{evol}})$ | $p(S_{\text{WL}})$ |
|------------|----------------------|--------------------|
| #1         | 0.833                | 0.833              |
| #2         | 0.800                | 0.600              |
| #3         | 0.333                | 0.666              |
| #4         | 0.400                | 0.400              |
| #5         | 0.400                | 0.800              |
| #6         | 1.000                | 1.000              |
| #7         | 0.600                | 0.400              |
| #8         | 1.000                | 0.800              |
| #9         | 0.600                | 1.000              |
| #10        | 0.600                | 0.600              |
| #11        | 0.800                | 0.600              |
| #12        | 0.857                | 0.571              |
| #13        | 0.400                | 0.400              |
| #14        | 0.400                | 0.400              |
| #15        | 0.600                | 0.600              |
| #16        | 0.333                | 0.333              |
| #17        | 0.833                | 0.833              |
| #18        | 0.555                | 0.666              |
| #19        | 0.714                | 0.714              |
| #20        | 0.857                | 0.857              |
| #21        | 0.600                | 0.800              |
| #22        | 0.600                | 0.400              |
| #23        | 0.800                | 0.600              |
| #24        | 0.666                | 1.000              |
| #25        | 0.400                | 0.400              |
| #26        | 0.600                | 1.000              |
| #27        | 0.400                | 0.400              |
| #28        | 0.555                | 0.400              |
| #29        | 1.000                | 1.000              |
| #30        | 0.833                | 0.833              |

## SI 8 Full distribution of expert similarities

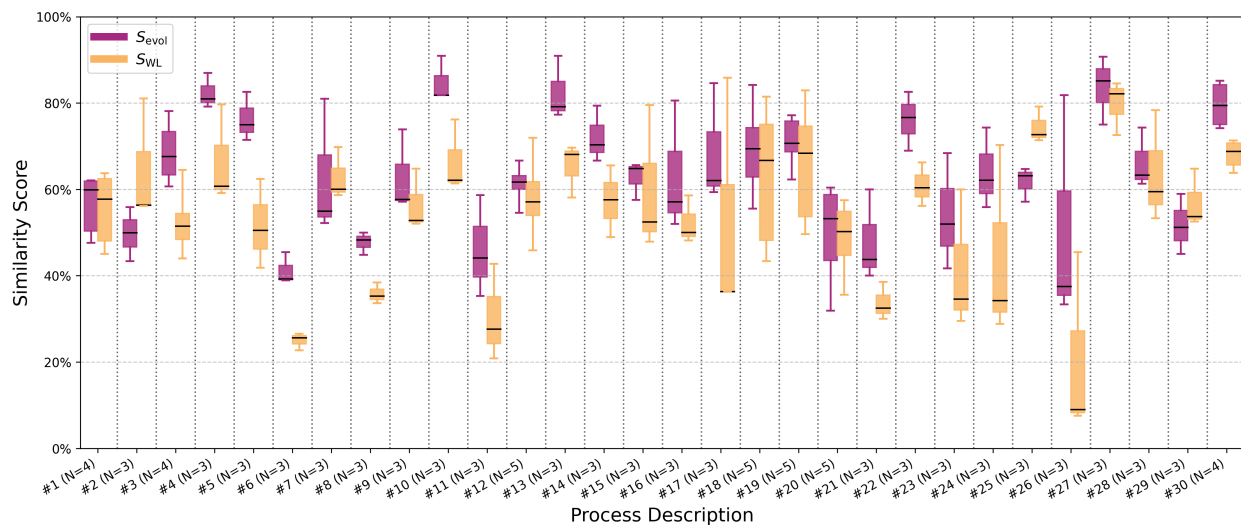

Figure 4: Distribution of pairwise expert similarities for all processes from the test set.  $N$  denotes the number of expert-drawn flowsheets for each test process.

## SI 9 Expert drawing examples

Examples of expert-drawn flowsheets from our collection campaign at the DECHEMA Annual Meeting of Process Engineering and Materials Technology 2025. These drawings were subsequently digitized by hand into the same graph format as the automatically digitized ones.



Process #18:

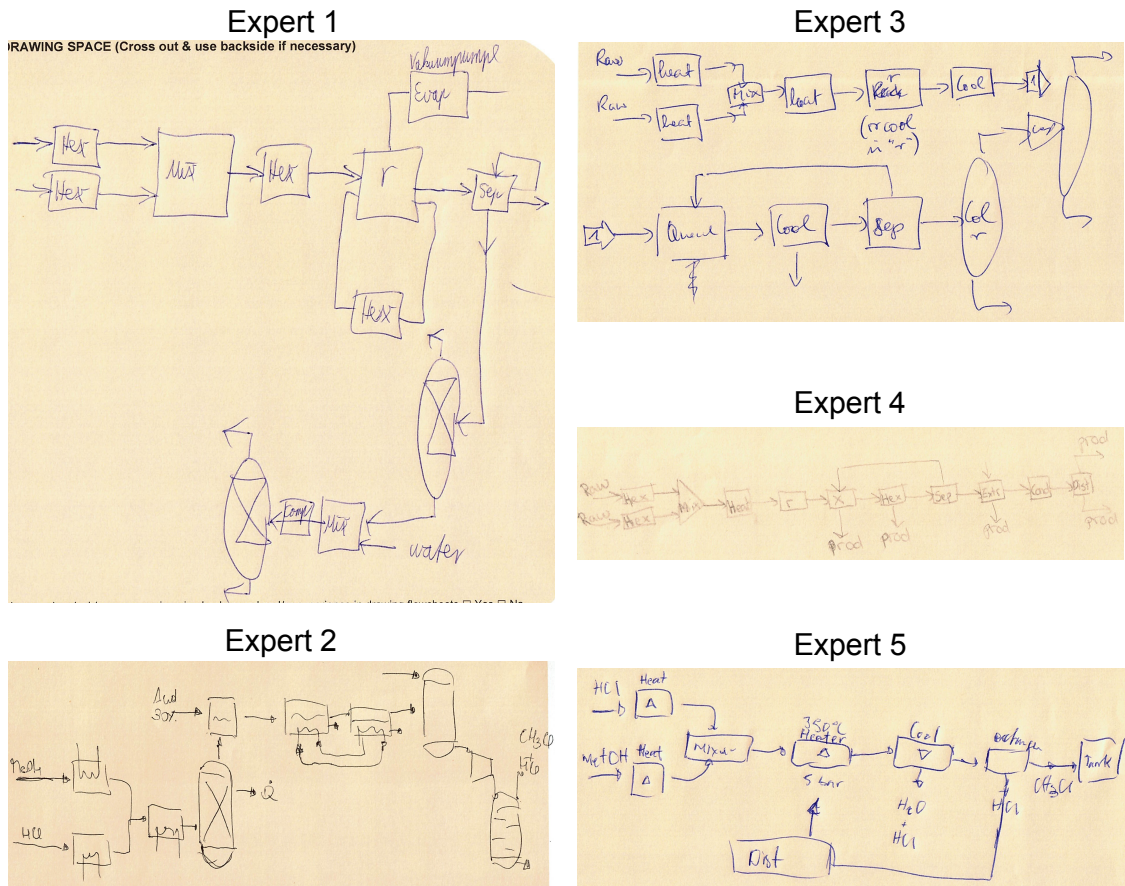

Figure 6: Expert-drawn flowsheet sketches for process #18 of the test set.

## SI 10 Test set processes details

Table SI 3: Process text descriptions in test set.  $|V|$  and  $|E|$  denote the number of nodes (units, inlet and outlet streams) and edges (connecting streams) of the LLM-digitized flowsheet graph.

| Process ID | Main product             | Short description                                               | Words in text | $ V $ of graph | $ E $ of graph | Source                  | LLM        |
|------------|--------------------------|-----------------------------------------------------------------|---------------|----------------|----------------|-------------------------|------------|
| #1         | Acetaldehyde             | VEBA-Chemie process for acetaldehyde from ethanol               | 123           | 17             | 15             | Ullmann's <sup>12</sup> | gpt-5-mini |
| #2         | Acetaldehyde             | Wacker process for acetaldehyde from ethylene                   | 197           | 23             | 23             | Ullmann's               | gpt-5-mini |
| #3         | Formaldehyde             | Formox process for formaldehyde from methanol                   | 194           | 27             | 24             | Ullmann's               | gpt-5-mini |
| #4         | Phosgene                 | Industrial phosgene process from carbon monoxide and chlorine   | 157           | 16             | 15             | Ullmann's               | gpt-5-mini |
| #5         | Dimethylamine            | Commercial process for dimethylamine from methanol and ammonia  | 176           | 19             | 20             | Ullmann's               | gpt-5-mini |
| #6         | Propionaldehyde          | Oxo synthesis process for propanal from ethene                  | 194           | 19             | 20             | Ullmann's               | gpt-5-mini |
| #7         | Aniline                  | Bayer process for aniline from nitrobenzene                     | 188           | 22             | 22             | Ullmann's               | gpt-5-mini |
| #8         | Aniline                  | Aniline production process from phenol                          | 94            | 15             | 16             | Ullmann's               | gpt-5-mini |
| #9         | Diisopropyl ether        | Diisopropyl ether production from propylene                     | 106           | 15             | 13             | Ullmann's               | gpt-5-mini |
| #10        | Dimethyl malonate        | Dimethyl malonate production from methyl chloroacetate          | 58            | 13             | 14             | Ullmann's               | gpt-5-mini |
| #11        | Acetic Acid              | BASF process for acetic acid from methanol                      | 434           | 27             | 34             | Ullmann's               | gpt-5-mini |
| #12        | 2-Nitrotoluene           | Nitrotoluene production from toluene                            | 211           | 19             | 17             | Ullmann's               | gpt-5-mini |
| #13        | Catechol                 | Rhône-Poulenc process for catechol from phenol                  | 171           | 18             | 18             | Ullmann's               | gpt-5-mini |
| #14        | Formaldehyde             | Partial oxidation process for formaldehyde from methanol        | 482           | 28             | 28             | Ullmann's               | gpt-5-mini |
| #15        | Nitrobenzene             | Continuous nitrobenzene process from benzene                    | 196           | 21             | 24             | Ullmann's               | gpt-5-mini |
| #16        | 1,4-Butanediol           | Industrial production of 1,4-butanediol from 2-butyne-1,4-diol  | 136           | 22             | 16             | Ullmann's               | gpt-5-mini |
| #17        | Monoethylene Glycol      | Monoethylene glycol production process from ethylene oxide      | 210           | 19             | 17             | Ullmann's               | gpt-5-mini |
| #18        | Methyl Chloride          | Methyl chloride production from methanol                        | 373           | 27             | 24             | Ullmann's               | gpt-5-mini |
| #19        | Dichloromethane          | Hoechst process for dichloromethane from methanol               | 275           | 23             | 22             | Ullmann's               | gpt-5-mini |
| #20        | HCFC-141B                | HCFC-141B production process from methyl chloroform             | 247           | 33             | 37             | IHS PEP <sup>13</sup>   | gpt-oss    |
| #21        | Butadiene                | Butadiene production from n-butane                              | 191           | 21             | 21             | IHS PEP                 | gpt-oss    |
| #22        | Butadiene                | Butadiene production from butenes                               | 125           | 19             | 15             | IHS PEP                 | gpt-oss    |
| #23        | Hexene-1                 | Alphahexol process for 1-hexene from ethylene                   | 157           | 11             | 12             | IHS PEP                 | gpt-oss    |
| #24        | Hydrogen cyanide         | Andrussow process for hydrogen cyanide from methane             | 180           | 17             | 18             | IHS PEP                 | gpt-oss    |
| #25        | Maleic anhydride         | Maleic anhydride production from n-butane                       | 172           | 16             | 17             | IHS PEP                 | gpt-oss    |
| #26        | Methyl isobutyl carbinol | Methyl isobutyl carbinol production from methyl isobutyl ketone | 60            | 8              | 5              | IHS PEP                 | gpt-oss    |
| #27        | Phenol                   | Phenol production from benzene                                  | 163           | 18             | 20             | IHS PEP                 | gpt-oss    |
| #28        | Acetic acid              | Low pressure acetic acid production from methanol               | 249           | 21             | 21             | IHS PEP                 | gpt-oss    |
| #29        | Ethylene                 | Ethylene production from ethene                                 | 166           | 22             | 20             | IHS PEP                 | gpt-oss    |
| #30        | Acrylic acid             | Nippon Shokubai process for acrylic acid from propylene         | 158           | 13             | 14             | IHS PEP                 | gpt-oss    |

## SI 11 Objective functions for black-box unit optimization

Note that the optimizer can only adjust specific model parameters  $\mathbf{p}$ , e.g., the reflux ratio or reactor temperature, and cannot downgrade the model itself. This model simplification is kept outside the optimization loop to avoid that the optimizer exploits simplifications to artificially reduce the energy demand.

HK = heavy key component

LK = light key component

P = product component

E = extracted component

R = raffinate component

flash

$$\min \mathbf{f}(\mathbf{p}) = \begin{pmatrix} \frac{\dot{m}_{\text{LK in liquid}}}{\dot{m}_{\text{HK in liquid}}} + \frac{\dot{m}_{\text{HK in vapor}}}{\dot{m}_{\text{LK in vapor}}} \\ |\dot{Q}| \end{pmatrix} \begin{matrix} \{\text{ensuring separation split efficacy}\} \\ \{\text{preventing excessive energy demand}\} \end{matrix} \quad (3)$$

Decanter

$$\min f(\mathbf{p}) = \frac{\dot{m}_{\text{LK in heavy phase}}}{\dot{m}_{\text{HK in heavy phase}}} + \frac{\dot{m}_{\text{HK in light phase}}}{\dot{m}_{\text{LK in light phase}}} \quad (4)$$

RGibbs & RStoic

$$\min \mathbf{f}(\mathbf{p}) = \begin{pmatrix} -\frac{\dot{m}_{\text{P}}}{\dot{m}_{\text{Reactor outlet}}} \\ |\dot{Q}| \end{pmatrix} \quad (5)$$

Radfrac (distillation) & DSTWU

$$\min \mathbf{f}(\mathbf{p}) = \begin{pmatrix} \frac{\dot{m}_{\text{LK in bottom}}}{\dot{m}_{\text{HK in bottom}}} + \frac{\dot{m}_{\text{HK in top}}}{\dot{m}_{\text{LK in top}}} \\ -\dot{Q}_{\text{Cond}} + \dot{Q}_{\text{Reb}} \end{pmatrix} \quad (6)$$

Condenser

$$\min \mathbf{f}(\mathbf{p}) = \begin{pmatrix} \frac{\dot{m}_{\text{vapor}}}{\dot{m}_{\text{liquid}}} \\ |\dot{Q}| \end{pmatrix} \quad (7)$$

Evaporator

$$\min \mathbf{f}(\mathbf{p}) = \begin{pmatrix} \frac{\dot{m}_{\text{liquid}}}{\dot{m}_{\text{vapor}}} \\ |\dot{Q}| \end{pmatrix} \quad (8)$$

Extr

$$\min \mathbf{f}(\mathbf{p}) = \begin{pmatrix} \frac{\dot{m}_{\text{E in raffinate stream}}}{\dot{m}_{\text{R in raffinate stream}}} + \frac{\dot{m}_{\text{R in extract stream}}}{\dot{m}_{\text{E in extract stream}}} \\ \dot{m}_{\text{solvent}} \end{pmatrix} \quad (9)$$

Radfrac (absorption)

$$\min \mathbf{f}(\mathbf{p}) = \begin{pmatrix} \frac{\dot{m}_{\text{E in vapor}}}{\dot{m}_{\text{R in vapor}}} + \frac{\dot{m}_{\text{R in liquid}}}{\dot{m}_{\text{E in liquid}}} \\ \dot{m}_{\text{solvent}} \end{pmatrix} \quad (10)$$

## SI 12 Example of multi-object black-box optimization

The optimization of the “ACOLUMN” in example 3 of the main manuscript is performed with respect to two objective functions: the separation split objective, i.e., minimizing the fraction of heavy key in the top phase plus light key in the bottom phase, and the column’s aggregated energy demand. Figure 7 shows the obtained Pareto curve. As the final configuration, a point is chosen that minimizes the aggregated energy demand within a small tolerance region around the point with the best separation effectiveness. We have seen that this heuristic tends to yield more reasonable configurations that achieve the desired separation while avoiding excessive energy consumption. This heuristic, however, is intended only as a starting point and could be refined through expert-driven, process-specific analysis and optimization.

## SI 13 Process descriptions of examples 1, 2, and 4

### SI 13.1 Example 1

“One of the oldest production methods is that of Hoechst, a recycle chlorination which was introduced as early as 1923 and which, apart from modifications reflecting state-of-the-art technology, continues essentially unchanged, retaining its original importance. The gas which is circulated consists of a mixture of methane and monochloromethane. To this is added fresh methane and, as appropriate, monochloromethane obtained from methanol hy-

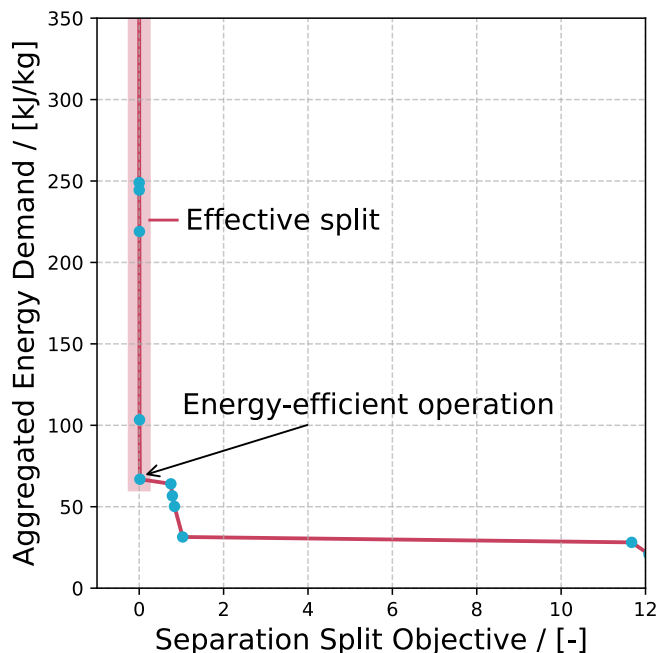

Figure 7: Pareto curve of separation split objective and aggregated energy demand (heating plus cooling) for the ammonia separation column (“ACOLUMN”) of the aniline from phenol process. The energy demand is normalized with respect to the incoming mass flow.

drochlorination. Chlorine is then introduced and the mixture is passed into the reactor. The latter is a loop reactor coated with nickel or highalloy steel in which internal gas circulation is constantly maintained by means of a coaxial inlet tube and a valve system. The reaction is conducted adiabatically, the necessary temperature of 350 – 450 °C being achieved and maintained by proper choice of the chlorine to starting material ( $\text{CH}_4 + \text{CH}_3\text{Cl}$ ) ratio and/or by prewarming the mixture. The fully reacted gas mixture is cooled in a heat exchanger and passed through an absorber cascade in which dilute hydrochloric acid and water wash out the resulting hydrogen chloride in the form of 31 % hydrochloric acid. The last traces of acid and chlorine are removed by washing with sodium hydroxide, after which the gases are compressed, dried, and cooled and the reaction products largely condensed. Any uncondensed gas — methane and to some extent monochloromethane — is returned to the reactor. The liquified condensate is separated by distillation under pressure into its pure components, monochloromethane, dichloromethane, trichloromethane (the latter two being

the principal products), and small amounts of tetrachloromethane. The product composition is approximately 70 wt % dichloromethane, is approximately 27 wt % trichloromethane, and 3 wt % tetrachloromethane.” Rossberg *et al.* (2011)<sup>14</sup>

### SI 13.2 Example 2

“Bayer operates conventional fixed-bed reactors using a palladium catalyst on a alumina support, modified in its activity by the addition of vanadium and lead and claims the adiabatic hydrogenation of nitrobenzene over a fixed-bed catalyst of 1.5 to 4 wt % palladium on coke with 0.1 to 2 wt % lead as a modifier to reduce aromatic ring hydrogenation. At a pressure of 100 – 700 kPa a mixture of vaporized nitrobenzene and hydrogen in a molar ratio of 1 : 120 to 1 : 200 is fed to the adiabatic reactor with an inlet temperature of 250 – 350 °C. The height of the catalysts’ bed in the reactor is 0.1 to 1.0 m. The reaction products leave the reactor without cooling at a maximum temperature of 460 °C. After leaving the reactor, the heat of reaction is used for the production of high pressure steam. A production unit can be built of several serial and/or parallel adiabatic reactors. After cooling down to 140 to 180 °C, the outlet of the final reactor is fed to a separation unit, where after further cooling crude aniline, crude wastewater, and the recycled hydrogen are separated under pressure. The crude aniline is purified by distillation.” Kahl *et al.* (2011)<sup>15</sup>

### SI 13.3 Example 4

“Carbon monoxide, methanol (containing up to 60% dimethyl ether), catalyst recycle, catalyst makeup, and methyl iodide recycle (from the wash column) are sent to the high-pressure reactor (stainless steel lined with Hastelloy). Part of the relatively low heat of reaction is used to preheat the feed and the rest is ultimately dissipated through the reaction vent. The reaction product is cooled and sent to the high-pressure separator. The off-gas goes to the wash column and the liquid is expanded to a pressure of 0.5–1.0 MPa in the intermediate-pressure separator. The gas released is also sent to the wash column; the liquid from the

intermediate-pressure separator is sent to the expansion chamber. The gas from the chamber goes to the scrubber. The gas from the scrubber and the wash column is discarded as off-gas. Both scrubber and wash column use the methanol feed to recover methyl iodide and other iodine-containing volatile compounds; this methanolic solution is returned to the reactor. The off-gas composition in vol% is 65–75 CO, 15–20 CO<sub>2</sub>, 3–5 CH<sub>4</sub>, and the balance CH<sub>3</sub>OH. The raw acid from the expansion chamber contains 45 wt% acetic acid, 35 wt% water, and 20 wt% esters, mainly methyl acetate. The acid is purified in five distillation towers. The first column degasses the crude product; the off-gas is sent to the scrubber column. The catalyst is then separated as a concentrated acetic acid solution by stripping the volatile components in the catalyst separation column. The acid is then dried by azeotropic distillation in the drying column. The overhead of the drying column contains acetic and formic acids, water, and byproducts that form an azeotrope with water. This overhead is a two-phase system that is separated in the chamber. Part of the organic phase, composed mainly of esters, is returned to column, where it functions as an azeotroping agent. The remainder of the organic phase is sent to the auxiliary column where heavy ends are separated at the bottom of the column, and light esters from the overhead are recycled to the reactor. The aqueous phase and the catalyst solution are returned to the reactor. The base of the drying column is sent to a finishing column, in which pure acetic acid is taken overhead. The bottom stream of the finishing tower is sent to the residue column. The overhead of this residue column is sent back to the dehydration column. The bottom of the residue column contains about 50 wt% propionic acid, which can be recovered.” Le Berre *et al.* (2014)<sup>16</sup>

## SI 14 LLM prompts for “text2flowsheet”

The LLM prompts themselves have been partially formulated and restructured using a large language model.

## SI 14.1 Topology construction

Unit operation extraction:

```
1 class UnitExtraction(dspy.Signature):
2     """
3     You are a highly accurate extraction engine for chemical process
4     modeling.
5
6     Your task is to identify all unit operations from a given process
7     description.
8
9     Your job is to:
10
11     1. Carefully read the process description.
12     2. Identify every instance where a unit operation is either explicitly
13     mentioned (e.g., "a mixer", "the distillation column") or implied
14     based on function (e.g., "two streams are combined", which implies a
15     Mixer).
16     3. Give every unit an individual name related to their role in the
17     process.
18     4. Specify the unit with a natural-language description paraphrased
19     from the process text. **Do not mention any chemical in this
20     description that is not clearly and explicitly mentioned in the process
21     description for that unit or stream.**
22
23     5. Assign the unit operation a type based on the following list. Use
24     only the abbreviations.
25
26     6. Determine if the unit is involved in the operative procedures of
27     the process to produce and refine the target chemical(s), or solely in
28     the maintenance of the reactor or catalyst that happens outside the
29     regular production sequence.
30
31     Return a list of 'UnitOperation' objects, one for each extracted unit.
```

18

19       Only use the following list of allowed unit operation types and  
20 abbreviations:

20

21       Absorption | Abs

22       Centrifuge | Centr

23       Compressor | Comp

24       Condenser | Cond

25       Cooler | Cool

26       Cyclone | Cycl

27       Distillation (incl. reboiler and condenser) | Dist

28       Drying | Dry

29       Evaporator | Evap

30       Expander | Expand

31       Extraction | Extr

32       Extractive Distillation | exDist

33       Flash | flash

34       Gas filtration | Gfil

35       Heater | Heat

36       Heat exchanger | Hex

37       Hydrocyclone | Hcycl

38       Liquid filtration | Lfil

39       Mixing | Mix

40       Pump | pp

41       Reactor | r

42       Rectification | Rect

43       Scrubbing | Scrub

44       Separation (no further sub-specification) | Sep

45       Settling | Set

46       Splitting | Splt

47       Stripping | Strip

48       Storage | Tank

49       Unknown unit | X

```

50
51     **Be thorough and exhaustive.** Every step or stage in the process
should be treated as a unit operation, even if the description is vague
or lacks detail.
52     Regarding the unit type: When uncertain, make the best possible
inference based on context and your knowledge of process engineering
and use the types 'X' (Unknown unit) and 'Sep' (unspecified separation)
only when absolutely necessary.
53
54     Extract condensers only when they are separate from a distillation, i.
e., they condense a stream that is not coming out of a distillation
column. Otherwise, only extract the distillation unit.
55
56     Only add splitters for recycle streams if one is **explicitly**
described in the process description.
57
58     Return the results as a list of unit operation objects with the
following fields:
59     - name: a short name of the unit
60     - type: one of the abbreviations listed above
61     - description: a concise explanation of the units purpose and
features
62     - function: the main function that the unit is involved in: either "
production", "maintenance", or "unclear"
63     """
64     process_description: str = dspy.InputField()
65     unit_operations: List[UnitOperation] = dspy.OutputField(desc="List of
UnitOperation objects of the specified type found in the process.")

```

Raw material stream extraction:

```

1 class RawExtraction(dspy.Signature):
2     """
3     You are a highly accurate natural language processing engine

```

specialized in the analysis of chemical process descriptions.

Your task is to extract and describe **all raw materials** used in the input process description.

**Be thorough and exhaustive.** Identify every material that enters the process from **outside its described boundaries**, whether it's a reagent, solvent, feedstock, catalyst, gas, or other input. **Do not** include intermediates formed within the process or materials recycled internally.

When uncertain, make the best possible inference based on context, but only include streams **explicitly described** in the process description. Do not include utility streams for heating and cooling.

For each identified raw material:

- Provide the common or chemical name of the material.
- Write a brief description of the materials role or function in the process (e.g., primary reactant, solvent, inert gas, etc.).

"""

```
process_description: str = dspy.InputField()
```

```
raw_materials: List[RawMaterial] = dspy.OutputField(
```

```
    desc="List of objects describing the raw materials of the process.
```

```
"
```

```
)
```

Product stream extraction:

```
1 class ProductExtraction(dspy.Signature):
```

```
2     """
```

```
3     You are a highly accurate natural language processing engine  
4     specialized in analyzing chemical process descriptions.
```

```
5     Your task is to determine the final outputs of the process and how  
6     they are handled.
```

6  
7  
8  
9  
10  
11  
12  
13  
14  
15  
16  
17  
18  
19  
20  
21  
22  
23  
24  
25  
26  
27  
28  
29

Perform this in two steps:

**\*\*Step 1: Identify and describe all final materials at the end of the process.\*\***

These may include:

- Intended products (main products, co-products)
- Unintended byproducts
- Leftover or unconverted reactants
- Waste streams or purge gases

Be comprehensive. If the process ends with a stream that contains multiple components not separated in the flowsheet, treat the mixture as a single product unless there's clear indication of separation.

**\*\*Step 2: For each identified material, determine if it leaves the process or is recycled.\*\***

- Mark 'leaves\_process=True' if the material exits the process boundary (as a product, waste, purge, etc.).
- Mark 'leaves\_process=False' if it is returned to an earlier unit or reused internally (i.e., part of a recycle loop or closed system).

**\*\*Do not\*\*** include intermediates or circulating internal streams unless they are explicitly described as leaving the process.

**\*\*Do not\*\*** invent products. Only extract materials that are explicitly or implicitly described in the process description.

Return a list of 'Product' objects, each with:

- 'name': The chemical or common name of the material.
- 'description': A short explanation of its role or context in the process.
- 'leaves\_process': Whether it exits the process or is recycled

```

internally.
30     """
31     process_description: str = dspy.InputField()
32     products: List[Product] = dspy.OutputField(
33         desc="List of objects describing the final outputs of the process
and whether they leave or are recycled."
34     )

```

Determine subsequent unit at open stream in graph:

```

1 class NextUnitQuery(dspy.Signature):
2     """
3     You are a chemical process flowsheet expert analyzing the structure of
the flowsheet underlying the given process description.
4
5     Given the current unit operation and a specific outgoing stream label,
determine the identifier (unit_id) of the next downstream unit
operation stream connected to this stream or connect it to a final
product stream.
6
7     Always choose the immediately following process operation, i.e., when
two reactants are first mixed and then reacted, the following unit
operation would be a mixer, or when a stream is first heated / cooled /
pumped / compressed and then further processed, the following unit
would be a heater / cooler / pump / compressor.
7
8     The outgoing stream label gives you a hint about the connection we
want to establish with respect to the current unit operation. "main"
means, that the current unit operation has only one outlet, so we are
simply looking for the next unit operating that receives this outgoing
stream. "top" / "bottom" indicates that we are looking at the top /
bottom stream of the current unit (a distillation column), which gives
you a hint which following unit we want to extract from the process
description. Similarly, "vapor" / "liquid" indicate the two different
outgoing streams of a flash, "light" / "heavy" of a settler etc.

```

9 All units except final product outlet streams have such labels,  
indicating that a connection must exist. Only final product outlet  
streams have no further connections.

10 In the case of two outgoing stream labels, make an educated guess  
which label corresponds to which stream from the text. If one of the  
stream labels is already connected to a unit operation, infer from that  
connection which other stream from the text could be represented by  
the to-be-determined label.

11 Be particularly aware of units that result in the final product and  
make sure that one of its outgoing connections leads to a "Prod" node  
of that final product.

12  
13 The current unit can also be a raw material (indicated by the label "  
raw"). This signifies an incoming stream into the process boundaries  
and we are looking for its first processing step.

14  
15 If the current unit is a tank or storage unit (also indicated by the  
label "store"), the following unit will be a product stream (type == "  
Prod"). This might seem unconventional, but in this case it signifies  
that in principle, product can be taken out of this storage and thus  
leaving the overall process boundary.

16 Product streams may also follow other unit operations, e.g., usually  
after separations or other purification steps.

17  
18 When the description mentions that a stream is "returned", "recycled",  
or something similar, the following unit is situated earlier in the  
process flow, close to the current unit. Be thorough when examining  
possible following units for recycled streams and choose one that is  
situated BEFORE the current unit and not one in a parallel branch of  
the flowsheet. Do not be confused by similar sounding unit names or  
descriptions!

19  
20 You have access to the entire process description and the full list of

all units that was extracted from this description and labeled before.

Included in the list of all units are also the final product streams leaving the process, which can be selected as following unit operations as well.

**\*\*Some unit operations may be explicitly excluded from selection in a given query. These are listed in the 'excluded\_units' field. You must not select any unit\_id from this list as the next downstream unit. When in doubt, rather return None instead of a unit from the list of excluded units.\*\***

Adhere to the given process description under any circumstance, even if common engineering knowledge suggests otherwise.

When uncertain, make the best possible inference based on context. When no direct following unit is apparent, first reexamine the units with the type == "Prod", as the stream from the current unit may leave the system as a product, by-product, or waste stream.

Always try to find a following unit operation, but if the outgoing stream is leaving the scope of the process description, return None.

Respond with the next unit's identifier (e.g., "U\_3"), a single string

"""

```
process_description: str = dspy.InputField()
```

```
unit: UnitWithConnections = dspy.InputField()
```

```
output_label: str = dspy.InputField()
```

```
all_units: List[UnitWithConnections] = dspy.InputField()
```

```
excluded_units: List[UnitWithConnections] = dspy.InputField()
```

```
next_unit_id: Union[None, constr(pattern=r"^U_\d+\$")] = dspy.  
OutputField()
```

```
40     desc="The unit_id of the next downstream unit."
41 )
```

Integrate leftover unit in graph:

```
1 class DetermineUpstreamUnit(dspy.Signature):
2     """
3     You are a chemical process flowsheet expert.
4
5     Your primary goal is to determine where the candidate unit most
6     logically fits into the existing process sequence.
7
8     You are given:
9     - A description of the overall process.
10    - The candidate unit that has not yet been placed.
11    - A list of units that are already connected in the process, along
12    with their known connections.
13
14    Your task is to identify the upstream unit that the candidate most
15    likely follows. Focus on logical placement within the process narrative
16    and functional flow. Stick to the process description at all times.
17
18    Use all available information - including the candidate unit's name,
19    type, and description, as well as clues from the process description
20    to infer its likely upstream context.
21
22    Make your best educated guess, and only return None if no logical
23    upstream unit based on the process description can be identified.
24
25    Return:
26    - The 'unit_id' of the upstream unit that should precede the candidate
27    , if a confident placement can be made.
28    - Return 'None' if no suitable upstream unit can be identified.
29    """
```

```

22 process_description: str = dspy.InputField()
23 candidate_unit: UnitWithConnections = dspy.InputField()
24 connected_units: List[UnitWithConnections] = dspy.InputField()
25
26 upstream_unit_id: Union[None, constr(pattern=r"^U_\d+$")] = dspy.
OutputField(
27     desc="The unit_id of the upstream unit that the candidate unit
should follow."
28 )

```

Integrate leftover product stream in graph:

```

1 class DetermineFinalProductUpstream(dspy.Signature):
2     """
3     You are a chemical process flowsheet expert.
4
5     Your task is to determine which unit in the process produces a
specific product, byproduct, or waste stream.
6
7     You are given:
8     - A natural language description of the overall process.
9     - The candidate unit representing the product, byproduct, or waste
stream.
10    - A list of connected units in the process and their current outgoing
connections.
11
12    Focus your analysis on identifying the upstream unit that generates
the candidate unit stream. Specifically:
13
14    1. Look for units with undefined ('None') outgoing connections, as
these may indicate yet undetermined streams that need a destination.
15    2. Consider context from the process description that indicates the
stream is leaving the process, such as mentions of collection, disposal
, or transfer.

```

```

16 3. Do **not** connect the candidate unit mid-process or into a recycle
17 loop.
18
19 Make the best educated guess based on the process description.
20
21 Return:
22 - The 'unit_id' of the upstream unit that produces this stream.
23 """
24 process_description: str = dspy.InputField()
25 candidate_unit: UnitWithConnections = dspy.InputField()
26 connected_units: List[UnitWithConnections] = dspy.InputField()
27
28 upstream_unit_id: Union[constr(pattern=r"^U_\d+$")] = dspy.OutputField
29 (
30     desc="The unit_id of the upstream unit that produces the finalized
31     product stream to be handled by the candidate unit."
32 )

```

Helper prompt to determine possible upstream connections of leftover units:

```

1 def make_determine_connection_labels_signature(upstream_unit,
2 candidate_unit):
3     upstream_keys = list(upstream_unit.following_units.keys())
4     candidate_keys = list(candidate_unit.following_units.keys())
5
6     # Safeguard: if either set is empty, provide a dummy value to avoid
7     Literal[()] error
8     upstream_literals = tuple(upstream_keys) if upstream_keys else ("
9     _no_valid_labels_")
10    candidate_literals = tuple(candidate_keys) if candidate_keys else ("
11    _no_valid_labels_")
12
13    class DetermineConnectionLabels(dspy.Signature):
14        """

```

11 You are a chemical process flowsheet expert.

12  
13 Your task is to help integrate a new (candidate) unit into an  
existing chemical process flowsheet by determining how it fits both  
logically and structurally.

14  
15 You are given:

- 16 - A process description.
- 17 - A candidate unit that is not yet connected.
- 18 - An upstream unit that the candidate has been determined to  
follow.

19  
20 Your objective is to determine how this new unit should be  
connected in the process stream:

21  
22 1. Based on the process description and unit metadata (type, name,  
description), select the output label from the upstream unit through  
which it should connect to the candidate unit. This label must be one  
of the keys in 'upstream\_unit.following\_units'. If the candidate unit  
has the type "Prod", always choose a label that is unconnected in the  
upstream unit (i.e., label: None), or return None if the upstream unit  
has no unassigned connections. If the candidate unit has any other type  
and the label assignment is unclear, also preferably choose the  
unconnected label.

23  
24 2. If the upstream unit was already connected to a downstream unit  
through that label, select the output label on the candidate unit (  
from its 'following\_units') that should now be used to continue the  
stream to that downstream unit.

25  
26 In doing so, you are refining and maintaining the correct process  
flow, ensuring that stream logic is preserved while inserting the new  
unit.

```

27
28     Return 'None' for 'handoff_label' if no downstream unit is
displaced.
29     """
30     process_description: str = dspy.InputField()
31     upstream_unit: UnitWithConnections = dspy.InputField()
32     candidate_unit: UnitWithConnections = dspy.InputField()
33
34     connection_label: Union[None, Literal[upstream_literals]] = dspy.
OutputField(
35         desc="The output label on the upstream unit used to connect to
the candidate unit. Must be in 'upstream_unit.following_units'."
36     )
37     handoff_label: Union[None, Literal[candidate_literals]] = dspy.
OutputField(
38         desc="The output label on the candidate unit to forward the
stream to a downstream unit (if one was displaced). Must be in '
candidate_unit.following_units'."
39     )
40
41     return DetermineConnectionLabels

```

Characterize added outlet stream:

```

1 class InferMissingOutputStream(dspy.Signature):
2     """
3     You are a highly accurate reasoning engine for reconstructing missing
output streams in chemical process descriptions.
4
5     Your task is to infer the identity and purpose of a missing output
stream from a given unit operation. This occurs when a unit has a
defined output label but no downstream connection, indicating an
unhandled flow leaving the system.
6

```

```

7     You are given:
8     - The full process description.
9     - A specific unit ('unit') that has a missing outflow.
10    - The name of the output label from which the stream leaves (e.g., "
bottom", "light", "raffinate", "filtrate").
11
12    Your job is to:
13    1. Analyze the process context and the role of the unit to determine
what stream is expected to exit through this label.
14    2. Infer the most likely purpose and contents of the stream (e
.g., product, waste, purge, vent, bleed, recycle).
15    3. Generate:
16        - A short, meaningful name for a new stream unit that will
receive this output (this name will become a new 'Prod' unit).
17        - A brief description (1 2 sentences) explaining what the
stream is, where it comes from, and why it is present in the process.
18
19    Guidelines:
20    - Base your inference on the process description, stream label, and
type/purpose of the unit.
21    - Do not leave any fields blank. Even in ambiguous cases, provide your
best justified guess based on chemical process engineering logic.
22
23    Return:
24    - 'name': A concise identifier for the new output stream.
25    - 'description': A short explanation of what the stream represents and
its role in the process.
26
27    This task is required for every unconnected output. Do not return None
.
28    """
29    process_description: str = dspy.InputField()
30    unit: UnitWithConnections = dspy.InputField()

```

```
31 connection_label: str = dspy.InputField()
32
33 name: str = dspy.OutputField(desc="Specific name for the new output
stream unit")
34 description: str = dspy.OutputField(desc="Concise but detailed
explanation of what this stream is and why it exists.")
```

Characterize added inlet stream:

```
1 class ExtractionMediumInference(dspy.Signature):
2     """
3     You are a chemical process analyst specializing in separation and
extraction steps.
4
5     Your task is to decide whether a given unit operation requires the
presence of an extraction medium or solvent,
6     and if so, to identify the most likely chemical that serves this
purpose.
7
8     You are given:
9     - The complete text of the process description.
10    - The specific unit operation under consideration (usually of type
Extr, Scrub, Wash, Leach, Abs, Stripping, etc.).
11
12    Guidelines:
13    - First decide if an extraction medium or solvent is required for this
unit.
14    - If required, propose the single most likely solvent or medium by its
**explicit name**.
15    - Prefer precise chemical names or standard trade names over vague
descriptors.
16    - Do not invent exotic solvents unless strongly implied; prefer common
industrial solvents (e.g., water, toluene, hexane) when supported by
the context.
```

```

17     - If no solvent is needed, set 'needs_medium=False' and leave the '
medium_name' field as None.
18
19     Return:
20     - 'needs_medium': True if the unit requires a solvent/extraction
medium, otherwise False.
21     - 'medium_name': The name of the solvent (string) if one is needed,
otherwise None.
22     """
23
24     process_description: str = dspy.InputField()
25     extraction_unit: UnitWithConnections = dspy.InputField()
26
27     needs_medium: bool = dspy.OutputField(
28         desc="True if the unit requires an extraction medium/solvent,
otherwise False."
29     )
30     medium_name: Optional[str] = dspy.OutputField(
31         desc="The most likely solvent/extraction medium required by this
unit (string), or None if not needed."
32     )

```

## SI 14.2 Data augmentation

Extract chemical compounds in inlet or outlet stream:

```

1 class StreamCompoundExtraction(dspy.Signature):
2     """
3     You are a highly accurate chemical name extractor for process stream
analysis.
4
5     Your task is to extract the chemical compound(s) present in a
given stream from a process flowsheet.
6

```

7 The stream is represented by a unit operation of type "Prod" (product  
leaving the system) or "Raw" (material entering the system). These  
streams typically contain **one** main chemical component, but in some  
cases, they might contain more.

8  
9 You are given:

- 10 - The full process description.
- 11 - The specific stream unit (of type "Prod" or "Raw") to analyze.

12  
13 **Your job is to identify the chemical compound(s) that are clearly  
present in this stream.**

14  
15 Be highly specific and concise:

- 16 - Only provide one name per chemical! Choose the primary name given  
for any component. Prefer explicit trade names over chemical names.
- 17 - **Avoid vague names** (e.g., "residue", "product stream") or generic  
descriptors.
- 18 - Do **not** include process roles or descriptions just return the  
clean compound names.
- 19 - Be exhaustive but precise: only list compounds that are **explicitly  
or clearly implied** to be present in the stream.

20  
21 When uncertain, make the best possible inference from the surrounding  
context in the process description.

22  
23 Return a list of StreamCompound objects.

24 """

25 process\_description: str = dspy.InputField()

26 stream\_unit: UnitWithConnections = dspy.InputField()

27  
28 compounds: List[StreamCompound] = dspy.OutputField(  
29

desc="A list of clearly named chemical compounds found in this  
stream, suitable for conversion to SMILES.")

30 )

Interpret ambiguous compound name:

```
1 class InterpretAmbiguousCompound(dspy.Signature):
2     """
3     You are a chemical informatics expert with deep domain knowledge of
4     industrial and organic chemistry.
5
6     Your task is to interpret a single unresolved or ambiguous compound
7     name that could not be resolved by PubChem or other canonical sources.
8
9     These names often include:
10    - Trade names, process-specific terms (e.g., "light ends", "reaction
11    residue", "sour water")
12    - Chemical classes or shorthand (e.g., "sodium salts", "MEG", "glycols")
13    - Mixtures, side streams, or byproducts whose composition depends on
14    the reaction context
15
16    You are provided with the full chemical process description from which
17    this name was extracted.
18
19    Your goals are to:
20    1. Infer what the name likely refers to chemically, using your
21    background and the process context (e.g., type of reaction, reagents,
22    known co-products).
23    2. Propose one or more plausible chemical components that best
24    match the name. Use IUPAC or widely accepted names.
25    3. Break down mixtures when appropriate, identifying major
26    components.
27    4. Be chemically conservative only unify ambiguous terms if
28    the inference is strongly supported by the context.
29    5. Preserve case distinctions and abbreviations if they are
```

```

19     chemically meaningful (e.g., "MEA"      "Mea").
20     6. Return a concise explanation of how you interpreted the name.
21
22     Input:
23     - A single 'original_name' that failed resolution
24     - The full 'process_description' for contextual reasoning
25
26     Output:
27     - A 'CompoundEntry' object:
28         - 'original_name': the input name
29         - 'components': a list of 'Component' objects, one for each
30     plausible standardized interpretation
31
32     Your explanation will be used for validation and traceability.
33     """
34     original_name: str = dspy.InputField(
35         desc="One unresolved compound name that could not be resolved via
36     PubChem. May be a mixture, shorthand, or ambiguous term."
37     )
38     process_description: str = dspy.InputField(
39         desc="The full description of the chemical process this name
40     appears in. Use this to infer chemical identity."
41     )
42     compound_entry: CompoundEntry = dspy.OutputField(
43         desc="A mapping of the original ambiguous name to one or more
44     plausible standardized components."
45     )
46     explanation: str = dspy.OutputField(
47         desc="Justification for your interpretation. Include how process
48     context, chemical reasoning, or known reaction products informed your
49     choices."
50     )

```

Examine reactors for additional compounds:

```
1 class ReactionCompoundDiscovery(dspy.Signature):
2     """
3     You are an expert chemical process analyst specializing in industrial
4     reactions.
5
6     Your task is to analyze the provided process description together with
7     a list of known chemicals associated exclusively with a specific
8     chemical reactor unit (including all incoming reactants and possible
9     products directly related to that unit).
10
11     You must determine:
12     - Whether there are any additional chemical compounds involved only
13     in the reaction occurring within the given reactor unit, beyond those
14     listed.
15     - Explicitly suggest these additional compounds by name.
16
17     You are given:
18     - The complete text of the process description.
19     - The reactor unit under consideration.
20     - A unified list of chemicals relevant to this reactor unit (both
    incoming and potential products), which may include raw or standardized
    names.
    - A translation lookup dictionary to resolve ambiguous or unclear
    chemical names.
    - Important:
    - Restrict your analysis strictly to the reaction chemistry happening
    inside the specified reactor unit.
    - Do not include or suggest chemicals that appear elsewhere in the
    overall process but are unrelated to this specific reactor.
    - Chemicals introduced after or before this reactor in the process
```

flow that do not participate in the reaction at this unit must be excluded.

21 - Use the process context to identify minor components, intermediates, byproducts, catalysts, or solvents that are very likely involved in this reactor's chemistry but missing from the input list.

22 - HOWEVER, do not add chemical species that do not have a basis in the text description!

23 - When uncertain about chemical names, prefer the clearer, standardized terms from the translation lookup.

24  
25 You must return:

26 - A list of additional chemical names that appear to participate directly in the reaction at the given reactor unit but are missing from the input list.

27 """

28 process\_description: str = dspy.InputField()

29 reactor\_unit: UnitWithConnections = dspy.InputField()

30 chemicals: List[str] = dspy.InputField()

31 translation\_lookup: Dict[str, List[str]] = dspy.InputField()

32  
33 additional\_chemicals: List[str] = dspy.OutputField(  
34

desc="Chemicals that participate in the reaction but are missing from the input list."  
35

)

Extract reaction conditions:

```
1 class ReactionConditionsExtraction(dspy.Signature):
```

```
2     """
```

```
3     You are a chemical process engineer analyzing reactor operating  
4     conditions.
```

```
5     Your task is to extract the reaction temperature and reaction  
6     pressure for a given reactor unit, based on the process description.
```

6  
7  
8  
9  
10  
11  
12  
13  
14  
15  
16  
17  
18  
19  
20  
21  
22  
23  
24  
25  
26  
27  
28  
29

Focus only on the specific reactor unit provided. Use its name, type, and description to find relevant statements. Look for phrases like:

- "The reactor operates at 300 C and 10 bar."
- "Reaction occurs at 500 K and elevated pressure."
- "A pressure of 100 psi is maintained during reaction."

Return both the **numeric value** and the **unit** as written in the **text** (e.g., "K", " C ", "atm", "bar", "psi").

If the temperature or pressure is not mentioned, return None for both the value and unit.

Do not infer values unless clearly stated in relation to the given unit.

Return:

- Reaction temperature value and unit
- Reaction pressure value and unit

"""

process\_description: str = dspy.InputField()

reactor\_unit: UnitWithConnections = dspy.InputField()

temperature\_value: Union[None, float] = dspy.OutputField(desc="Reaction temperature value")

temperature\_unit: Union[None, Literal[" C ", "K", " F "]] = dspy.OutputField(desc="Temperature unit from the text")

pressure\_value: Union[None, float] = dspy.OutputField(desc="Reaction pressure value")

pressure\_unit: Union[None, Literal["bar", "atm", "Pa", "kPa", "MPa", "psi", "psig", "psia"]] = dspy.OutputField(desc="Pressure unit from the text")

Extract pressure level from distillation-like separations:

```
1 class DistillationPressureExtraction(dspy.Signature):
2     """
3     You are a chemical process engineer analyzing the operating pressure
4     conditions
5     of a distillation column.
6
7     Your task is to extract the top (overhead) pressure and bottom
8     pressure
9     for the given distillation column, based on the process description.
10
11     Focus only on the specific distillation column provided. Use its name,
12     type,
13     and description to find relevant statements. Look for phrases like:
14
15     - "The column overhead operates at 1.2 bar."
16     - "Top pressure is maintained at 80 kPa."
17     - "Bottoms pressure reaches 2 atm."
18     - "The column operates under a condenser pressure of 3 bar."
19
20     Return the numeric value and the unit exactly as written in the
21     text
22     (e.g., "bar", "atm", "Pa", "kPa", "MPa", "psi", "psig", "psia").
23
24     If a specific pressure (top or bottom) is not mentioned, return None
25     for both
26     the value and the unit.
27
28     If a pressure value is mentioned but it is unclear whether it refers
29     to
30     the top or the bottom of the column, return it for both top and
31     bottom pressure.
```

```

25
26     Do not infer or assume pressure values unless clearly stated for this
column.
27
28     Return:
29     - Top pressure value and unit
30     - Bottom pressure value and unit
31     """
32     process_description: str = dspy.InputField()
33     distillation_column: UnitWithConnections = dspy.InputField()
34
35     top_pressure_value: Union[None, float] = dspy.OutputField(desc="
Overhead/Condenser pressure value")
36     top_pressure_unit: Union[None, Literal["bar", "atm", "Pa", "kPa", "MPa",
", "psi", "psig", "psia"]] = dspy.OutputField(desc="Overhead pressure
unit from text")
37
38     bottom_pressure_value: Union[None, float] = dspy.OutputField(desc="
Bottoms/Reboiler pressure value (or ambiguous pressure)")
39     bottom_pressure_unit: Union[None, Literal["bar", "atm", "Pa", "kPa", "
MPa", "psi", "psig", "psia"]] = dspy.OutputField(desc="Bottoms pressure
unit from text")

```

Infer which components are recycled:

```

1 class RecycleChemicalInference(dspy.Signature):
2     """
3     You are a domain-aware assistant specializing in interpreting chemical
engineering flowsheets.
4
5     Your task is to identify the most likely recycled chemical(s) at a
specific unit operation where the flow path enters a recycle loop.
6
7     You are given:

```

- 8 - The full description of the industrial process.
- 9 - The current unit operation, provided as a structured object including its type and connections.
- 10 - The name of the outgoing connection (e.g., 'top', 'bottom') that leads into the recycle path.
- 11 - A list of all known chemicals involved anywhere in the process via 'translation\_lookup'.

12

13 Guidelines:

- 14 - Prefer a **single recycled chemical** when there is a clear candidate.
- 15 - However, if it is chemically or operationally justified (e.g., azeotropes, unreacted feedstock, incomplete separations), return **multiple plausible recycled chemicals**.
- 16 - Use the process description and unit structure to reason about typical recycle behavior.
- 17 - Use 'translation\_lookup' to ensure chemical names are standardized.
- 18 - If uncertain, return a small set of likely candidates rather than overgeneralizing.

19

20 You must return:

- 21 - A list of one or more recycled chemical names (as standardized strings).

22

```
23 process_description: str = dspy.InputField()
24 unit: UnitWithConnections = dspy.InputField()
25 connection_label: str = dspy.InputField()
26 translation_lookup: Dict[str, List[str]] = dspy.InputField()
27
28 recycled_chemicals: List[str] = dspy.OutputField(
29     desc="List of one or more most likely recycled chemical names
30     through this connection"
31 )
```

Flag azeotropes:

```
1 class AzeotropeDetection(dspy.Signature):
2     """
3     You are a precise chemical process analyst specializing in phase
4     equilibria and azeotrope identification.
5
6     Your task is to determine whether an azeotrope is likely to exist in a
7     specified distillation step, and if so,
8     to identify which components from the given top and bottom product
9     streams are involved.
10
11    You are given:
12    - The complete text of the process description.
13    - A specific distillation-type unit operation, including its name and
14    other available details.
15    - A list of chemical components present in the top (overhead) product
16    stream of the unit.
17    - A list of chemical components present in the bottom (residue)
18    product stream of the unit.
19
20    Critical guidance:
21    - **Base your reasoning primarily on explicit or implied information
22    from the process description**.
23    - Use chemical knowledge only to interpret and clarify what the
24    process description suggests - do not override it.
25    - Focus exclusively on the distillation unit provided.
26    - Only consider azeotropes formed from the given top and bottom stream
27    chemicals.
28    - If no azeotrope is likely according to the process description,
29    state so clearly.
30    - If an azeotrope is likely, list all involved components and ensure
31    they are drawn from the provided chemical lists.
```

```

21
22     You must return:
23     - Whether an azeotrope exists (True/False).
24     - The list of components (from top and/or bottom streams) involved in
the azeotrope, if any.
25     """
26     process_description: str = dspy.InputField()
27     distillation_unit: UnitWithConnections = dspy.InputField()
28     top_chems: List[str] = dspy.InputField()
29     bottom_chems: List[str] = dspy.InputField()
30
31     azeotrope_exists: bool = dspy.OutputField(
32         desc="True if the process description indicates or strongly
implies an azeotrope in this unit, otherwise False."
33     )
34     azeotrope_components: List[str] = dspy.OutputField(
35         desc="List of components (subset of top_chems and/or bottom_chems)
involved in the azeotrope."
36     )

```

## References

- (1) Vogel, G.; Hirtreiter, E.; Schulze Balhorn, L.; Schweidtmann, A. M. SFILES 2.0: an extended text-based flowsheet representation. *Opt. Eng.* **2023**, *24*, 2911–2933.
- (2) Morbach, J.; Yang, A.; Marquardt, W. OntoCAPE—A large-scale ontology for chemical process engineering. *Eng. Appl. Artif. Intell.* **2007**, *20*, 147–161.
- (3) Kim, S.; Chen, J.; Cheng, T.; Gindulyte, A.; He, J.; He, S.; Li, Q.; Shoemaker, B. A.; Thiessen, P. A.; Yu, B.; Zaslavsky, L.; Zhang, J.; Bolton, E. E. PubChem in 2021: new data content and improved web interfaces. *Nucleic Acids Res.* **2021**, *49*, D1388–D1395.
- (4) Landrum, G. RDKit: Open-source cheminformatics. 2010.
- (5) Rehner, P.; Bauer, G.; Gross, J. FeOs: an open-source framework for equations of state and classical density functional theory. *Ind. Eng. Chem. Res.* **2023**, *62*, 5347–5357.
- (6) Esper, T.; Bauer, G.; Rehner, P.; Gross, J. PCP-SAFT parameters of pure substances using large experimental databases. *Ind. Eng. Chem. Res.* **2023**, *62*, 15300–15310.
- (7) Winter, B.; Rehner, P.; Esper, T.; Schilling, J.; Bardow, A. Understanding the language of molecules: predicting pure component parameters for the PC-SAFT equation of state from SMILES. *Digital Discovery* **2025**, *4*, 1142–1157.
- (8) Commenge, J.-M.; Piña-Martinez, A. Data-driven initialization of evolutionary methods for process synthesis considering centrality and diversity criteria. *Comput. Chem. Eng.* **2026**, *204*, 109416.
- (9) Neveux, T. Ab-initio process synthesis using evolutionary programming. *Chem. Eng. Sci.* **2018**, *185*, 209–221.
- (10) Shervashidze, N.; Schweitzer, P.; van Leeuwen, E. J.; Mehlhorn, K.; Borgwardt, K. M. Weisfeiler-Lehman graph kernels. *J. Mach. Learn. Res.* **2011**, *12*, 2539–2561.

- (11) Borgwardt, K.; Ghisu, E.; Llinares-López, F.; O’Bray, L.; Rieck, B. Graph Kernels: State-of-the-Art and future challenges. *Found. Trends Mach. Learn.* **2020**, *13*, 531–712.
- (12) *Ullmann’s Encyclopedia of Industrial Chemistry*; John Wiley & Sons, Ltd: Hoboken, USA.
- (13) *Process Economics Program (PEP) Yearbook*; IHS Markit: London, UK.
- (14) Rossberg, M.; Lendle, W.; Pfeiderer, G.; Tögel, A.; Torkelson, T. R.; Beutel, K. K. *Ullmann’s Encyclopedia of Industrial Chemistry*; John Wiley & Sons, Ltd, Hoboken, USA, 2011.
- (15) Kahl, T.; Schröder, K.-W.; Lawrence, F. R.; Marshall, W. J.; Höke, H.; Jäckh, R. *Ullmann’s Encyclopedia of Industrial Chemistry*; John Wiley & Sons, Ltd, Hoboken, USA, 2011.
- (16) Le Berre, C.; Serp, P.; Kalck, P.; Torrence, G. P. *Ullmann’s Encyclopedia of Industrial Chemistry*; John Wiley & Sons, Ltd, Hoboken, USA, 2014.
